# Supplementary material
Source: ML conference proceedings conference paper supplement (https://proceedings.mlr.press/v97/amin19a.html)
Supplement: Supplementary file [file amin19a-supp.pdf]

## A. Concentration bounds

In this section we include a series of well known concentration bounds used in the statistical learning literature. In order to prove this bounds we will use the notion of Rademacher complexity.

**Definition 7.** Given a sample  $z_1, \dots, z_m \in \mathcal{Z}$  and a class of functions  $G$  mapping  $\mathcal{Z}$  to  $[0, 1]$ , we define the empirical Rademacher complexity of  $G$  as

$$\mathfrak{R}_m(G) = \mathbb{E} \left[ \sup_{g \in G} \sum_{i=1}^m g(z_i) \sigma_i \right],$$

where  $\sigma_i$  are i.i.d. uniform random variables over the set  $\{-1, 1\}$ .

The Rademacher complexity of a class is closely related to its VC dimension. The following Lemma can be found in (Mohri et al., 2012).

**Lemma 3.** Let  $G$  be a function class with VC dimension  $\text{VCdim}(h) = d$  then

$$\mathfrak{R}(G) \leq \sqrt{2md \log \frac{em}{d}}$$

**Lemma 4.** Let  $L$  be  $K$ -Lipchitz and let  $\delta > 0$ . Conditioned on the choice of users belonging to the sample the following bound holds with probability at least  $1 - \delta$  for all  $h \in H$

$$\begin{aligned} & \left| \sum_j \sum_{i=1}^{n_{\tau j}} L(h(x_{ij}), y_{ij}) - \sum_j n_{\tau j} \mathcal{L}_j(h) \right| \\ & \leq 2K \mathfrak{R}_{n_{\tau}}(H) + \sqrt{\frac{n_{\tau} \log \frac{1}{\delta}}{2}} \end{aligned}$$

*Proof.* Relabeling the samples we notice that the left hand side of the above inequality is given by

$$\left| \sum_{i=1}^{n_{\tau}} L(h(x_i), y_i) - \mathbb{E} \left[ \sum_{i=1}^{n_{\tau}} L(h(x_i), y_i) \right] \right|.$$

Let  $H_L = \{(x, y) \mapsto L(h(x), y) | h \in H\}$ , using the fact that  $(x_i, y_i)$  are independent conditioned on the choice of users and a standard learning theory bound (Mohri et al., 2012) we have with probability at least  $1 - \delta$

$$\begin{aligned} & \left| \sum_{i=1}^{n_{\tau}} L(h(x_i), y_i) - \mathbb{E} \left[ \sum_{i=1}^{n_{\tau}} L(h(x_i), y_i) \right] \right| \\ & \leq \mathfrak{R}_{n_{\tau}}(H_L) + \sqrt{\frac{n_{\tau} \log \frac{1}{\delta}}{2}}. \end{aligned}$$

Finally by Talagrand's contraction lemma (Mohri et al., 2012) we know that  $\mathfrak{R}_{n_{\tau}}(H_L) \leq K \mathfrak{R}_{n_{\tau}}(H)$  which concludes the proof.  $\square$

**Lemma 1.** Conditioned on the outcomes of  $\{J_i\}$ , with probability at least  $1 - \delta$  the following holds uniformly over  $h \in H$ :

$$\left| \mathcal{L}_{\mathcal{S}_{\tau}}(h) - \sum_j \frac{n_{\tau j}}{n_{\tau}} \mathcal{L}_j(h) \right| \leq \sqrt{\frac{2d \log \frac{en}{d}}{\tau_0 n}} + \sqrt{\frac{\log(1/\delta)}{2\tau_0 n}}$$

*Proof.* The proof follows directly from the previous proposition and a standard bound on the Rademacher complexity by the VC dimension (Mohri et al., 2012).  $\square$

**Lemma 2.** Fix  $\delta > 0$  and let  $d = \text{VCdim}(H)$ . Then with probability at least  $1 - \delta$ , the following inequality holds uniformly for  $h$  in  $H$ .

$$\begin{aligned} |\mathcal{L}_{\mathcal{S}_{\tau}}(h) - \mathcal{L}(h)| & \leq \sqrt{\frac{2d \log \frac{en}{d}}{\tau_0 n}} + \sqrt{\frac{\log(2/\delta)}{2\tau_0 n}} \\ & + \left| \sum_j \left( \frac{n_{\tau j}}{n_{\tau}} - \frac{n_j}{n} \right) \mathcal{L}_j(h) \right| + \sqrt{\frac{\log \frac{4}{\delta}}{2n}}. \end{aligned}$$

*Proof.* We begin by decomposing the loss into three parts.

$$|\mathcal{L}_{\mathcal{S}_{\tau}}(h) - \mathcal{L}(h)| \leq \left| \mathcal{L}_{\mathcal{S}_{\tau}}(h) - \sum_j \frac{n_{\tau j}}{n_{\tau}} \mathcal{L}_j(h) \right| \quad (7)$$

$$+ \left| \sum_j \left( \frac{n_{\tau j}}{n_{\tau}} - \frac{n_j}{n} \right) \mathcal{L}_j(h) \right| \quad (8)$$

$$+ \left| \sum_j \left( \frac{n_j}{n} - p_j \right) \mathcal{L}_j(h) \right|. \quad (9)$$

Eq. (7) is the generalization error of our empirical loss, conditioned on the outcomes of  $\{J_i\}$ . We bound it by applying Lemma 1 with  $\frac{\delta}{2}$ .

Eq. (8) is the error attributable to differences between the original dataset  $\mathcal{S}$  and the thresholded data set  $\mathcal{S}_{\tau}$ ; it appears directly in the bound.

Finally, Eq. (9) is the finite sample error due to the randomness in  $\{J_i\}$ . Observe that

$$\left| \sum_j \left( \frac{n_j}{n} - p_j \right) \mathcal{L}_j(h) \right| = \left| \frac{1}{n} \sum_{i=1}^n L_{J_i}(h) - \sum_j p_j \mathcal{L}_j(h) \right|,$$

which is just the difference between the sample mean of  $n$  i.i.d. random variables bounded in  $[0, 1]$  and their true mean. Hoeffding's inequality thus bounds (9) by  $\sqrt{\frac{\log \frac{4}{\delta}}{2n}}$  with probability  $1 - \frac{\delta}{2}$ .

Combining these results under a union bound completes the proof.  $\square$

## B. Bias bounds

**Proposition 2.** Let  $r_j$  for  $j \in \mathbb{N}$  be such that  $r_j \geq 0$  and  $\sum_{j=1}^n r_j = 1$ . Let  $0 \leq q_j \leq r_j$ ,  $Q = \sum_j q_j$ . Finally let  $q'_j = \frac{q_j}{Q}$ . If  $|L(h, z)| \leq 1$ , then the following bound holds for all hypotheses  $h$ .

$$\left| \sum_j (q'_j - r_j) \mathcal{L}_j(h) \right| \leq \sqrt{\frac{1}{2} \log \left( \frac{1}{Q} \right)}$$

*Proof.* Using the fact that  $\mathcal{L}_j(h) \leq 1$  we have

$$\left| \sum_j (q'_j - r_j) \mathcal{L}_j(h) \right| \leq \sum_j |q'_j - r_j| \quad (10)$$

Let  $\mathbf{r}$  and  $\mathbf{q}'$  denote the distributions induced by  $r_j$  and  $q'_j$  respectively. By Pinsker's inequality we know

$$\sum_{j=1}^n |q'_j - r_j| \leq \sqrt{\frac{1}{2} \text{KL}(\mathbf{r} \parallel \mathbf{q}')},$$

where  $\text{KL}(\mathbf{r} \parallel \mathbf{q}')$  denotes the Kullback-Leibler divergence between the two distributions. We can bound this divergence as follows:

$$\begin{aligned} \text{KL}(\mathbf{r} \parallel \mathbf{q}') &= \frac{1}{Q} \sum_j q_j \log \left( \frac{q_j}{Q r_j} \right) \leq \frac{1}{Q} \sum_j q_j \log \left( \frac{1}{Q} \right) \\ &= \log \left( \frac{1}{Q} \right), \end{aligned}$$

where we have used the fact that  $q_j < r_j$  for the first inequality. Substituting this bound back in (10) yields the statement of the proposition.  $\square$

We now define a more general version of the variance term introduced in Section 6.

**Definition 8.** Given a distribution  $\mathbf{r}$  over  $\mathbb{N}$  and a hypothesis  $h \in H$  we define the variance of  $h$  with respect to  $\mathbf{r}$  as

$$\text{Var}(h, \mathbf{r}) = \sum_j r_j (\mathcal{L}_j(h) - \mathcal{L}_h)^2.$$

**Proposition 3.** Under the notation and assumptions of Proposition 2, the following bound holds for every  $h$ :

$$\left| \sum_j (q'_j - r_j) \mathcal{L}_j(h) \right| \leq \sqrt{\frac{2 \text{Var}(h, \mathbf{r})}{Q}}$$

*Proof.* The proof relies on the simple fact that:

$$\sum_i \sum_j (\mathcal{L}_j(h) - \mathcal{L}_i(h)) r_i q'_j = \sum_j \mathcal{L}_j(h) q'_j - \sum_i \mathcal{L}_i(h) r_i.$$

This is easy to verify using the fact that  $\sum r_i = 1$  and  $\sum q'_j = 1$ . We can now apply the Cauchy-Schwarz inequality as follows:

$$\begin{aligned} &\left| \sum_j (q'_j - r_j) \mathcal{L}_j(h) \right| \\ &= \left| \sum_i \sum_j (\mathcal{L}_j(h) - \mathcal{L}_i(h)) q'_j r_i \right| \\ &= \left| \sum_i \sum_j (\mathcal{L}_j(h) - \mathcal{L}_i(h)) \sqrt{r_i r_j} \frac{q'_j}{\sqrt{r_j}} \sqrt{r_i} \right| \\ &\leq \sqrt{\sum_i \sum_j (\mathcal{L}_j(h) - \mathcal{L}_i(h))^2 r_i r_j} \sqrt{\sum_i \sum_j \frac{(q'_j)^2}{r_j} r_i} \\ &= \sqrt{\sum_i \sum_j (\mathcal{L}_j(h) - \mathcal{L}_i(h))^2 r_i r_j} \sqrt{\sum_j \frac{(q'_j)^2}{r_j}} \end{aligned}$$

A simple calculation shows that the first term in the above expression is in fact equal to  $2 \text{Var}(h, \mathbf{r})$ . Therefore we need only to prove that the second term is bounded by  $\frac{1}{Q}$ . We have

$$\begin{aligned} \sum_j \frac{(q'_j)^2}{r_j} &= \frac{1}{Q^2} \sum_j \frac{q_j^2}{r_j} \\ &\leq \frac{1}{Q^2} \sum_j q_j = \frac{1}{Q}, \end{aligned}$$

where we used the fact that  $q_j \leq r_j$ .  $\square$

The proof of Proposition 1 is easily derived from Propositions 2 and 3. Indeed, letting  $r_j = \frac{n_j}{n}$  and  $q_j = \frac{n_{j\tau}}{n}$  we have  $q_j \leq r_j$ , and thus the result follows.

## C. Additional bounds

**Proposition 4.** Let  $\tau \leq n$  be the cap on user contributions. Then  $n_\tau > \tau$ .

*Proof.* There are only two possibilities: either  $n_j < \tau$  for all  $j$  or  $n_j \geq \tau$  for some  $j$ . In the latter case  $n_\tau \geq n_j = \tau$  by definition. On the other hand, if  $n_j < \tau$  for all  $j$  then

$$n_\tau = \sum_j n_{j\tau} = \sum_j n_j = n \geq \tau. \quad \square$$

**Proposition 5.** Let  $1 > \tau_0 > 0$  and  $\tau = \tau_0 n$ . Let  $K(\tau_0) = |\{j \mid p_j > \tau_0\}|$  and let  $\delta > 0$ . With probability at least  $1 - \delta$ ,

$$\frac{n_\tau}{n} \geq \frac{\tau_0 K(\tau_0)}{4} - \sqrt{\frac{\log(1/\delta)}{2n}}.$$

*Proof.* Recall that  $J_i$  is the random variable that denotes the user corresponding to example  $i$ . We know that  $n_j = \sum_{i=1}^n \mathbb{1}_{J_i=j}$  and  $n_\tau = \sum_{i=1}^n \min(n_i, \tau)$ . Let  $\phi(J_1, \dots, J_n) = \frac{n_\tau}{n}$ . We want to bound the change in  $\phi$  as we perturb a single coordinate:

$$|\phi(J_1, \dots, J_n) - \phi(J'_1, \dots, J_n)|.$$

If we change only one point in the sample then, clearly, we change the contribution of at most two users  $i_1$  and  $i_2$ . Let  $n'_{i_1}$  and  $n'_{i_2}$  denote the user contributions under the perturbation. Then the above expression is equal to

$$\frac{1}{n} |\min(n_{i_1}, \tau) - \min(n'_{i_1}, \tau) + \min(n_{i_2}, \tau) - \min(n'_{i_2}, \tau)|. \quad (11)$$

Let us assume w.l.o.g. that  $n_{i_1} \geq n'_{i_1}$ ; this implies that  $n_{i_2} \leq n'_{i_2}$ . Therefore  $0 \leq \min(n_{i_1}, \tau) - \min(n'_{i_1}, \tau) \leq 1$  and  $0 \geq \min(n_{i_2}, \tau) - \min(n'_{i_2}, \tau) \geq -1$ . This readily implies that (11) is bounded by  $\frac{1}{n}$ . We can now apply McDiarmid's inequality and see that for any  $\eta > 0$

$$P\left(\frac{n_\tau}{n} \leq \frac{1}{n} \mathbb{E}[n_\tau] - \eta\right) \leq e^{-2n\eta^2}. \quad (12)$$

Now let  $Q(\tau_0) = \sum_{j=1}^n \min(p_j, \tau_0)$ . It is easy to see that

$$Q(\tau_0) = \sum_{j:p_j > \tau_0} \tau_0 + \sum_{j:p_j \leq \tau_0} p_j \geq K(\tau_0).$$

Therefore from Corollary 2 we know that

$$\begin{aligned} P\left(\frac{n_\tau}{n} \leq \frac{\tau_0 K(\tau_0)}{4} - \eta\right) &\leq P\left(\frac{n_\tau}{n} \leq \frac{Q(\tau_0)}{4} - \eta\right) \\ &\leq P\left(\frac{n_\tau}{n} \leq \frac{1}{n} \mathbb{E}[n_\tau] - \eta\right) \end{aligned}$$

The result follows from (12) by setting  $\delta = e^{-2n\eta^2}$  and solving for  $\eta$ .  $\square$

**Lemma 2.** Let  $S_n = \sum_{i=1}^N X_i$  be a sum of i.i.d. Bernoulli random variables with  $P(X_i = 1) = p$ . Then

$$\mathbb{E}[\min(S_n, \tau)] \geq \frac{1}{4} \min(pn, \tau) \quad (13)$$

*Proof.* First let us assume that  $\tau < np$  in that case we have:

$$\begin{aligned} \mathbb{E}[\min(S_n, \tau)] &= \mathbb{E}[S_n \mathbb{1}_{S_n < \tau}] + \tau P(S_n > \tau) \\ &\geq \tau P(S_n > \tau) \\ &\geq \tau P(S_n > np) \geq \frac{\tau}{4}, \end{aligned}$$

where we used the fact that  $P(S_n > np) > \frac{1}{4}$  (Greenberg & Mohri, 2013; Vapnik, 1998).

On the other hand if  $\tau > np$  then

$$\begin{aligned} \mathbb{E}[\min(S_n, \tau)] &\geq \mathbb{E}[S_n \mathbb{1}_{S_n < \tau}] \geq \mathbb{E}[S_n \mathbb{1}_{S_n > np}] \\ &= \int_0^\infty P(S_n \mathbb{1}_{S_n > np} > t) dt \\ &= \int_0^{np} P(S_n > t) dt \\ &\geq \int_0^{np} P(S_n > np) dt \\ &\geq \frac{1}{4} np \end{aligned}$$

Combining the two cases yields the statement of the proposition.  $\square$

**Corollary 2.** Let  $J_k, k = 1, \dots, n$  be a random variable in  $\mathbb{N}$  such that  $P(J_k = j) = p_j$ . Let  $n_j = \sum_{i=1}^n \mathbb{1}_{J_k=j}$ ,  $\tau_0 > 0$  and  $\tau = \tau_0 n$ . Finally, let  $n_\tau = \sum_j \min(n_j, \tau)$ ; then we have

$$\frac{1}{n} \mathbb{E}[n_\tau] \geq \frac{1}{4} \sum_j \min(p_j, \tau_0)$$

*Proof.* By Fubini's theorem,

$$\mathbb{E}[n_\tau] = \mathbb{E}\left[\sum_j \min(n_j, \tau)\right] = \sum_j \mathbb{E}[\min(n_j, \tau)].$$

On the other hand,  $n_j$  is a sum of independent Bernoulli random variables with probability  $p_j$ . So from the previous proposition we have

$$\begin{aligned} \frac{1}{n} \sum_j \mathbb{E}[\min(n_j, \tau)] &\geq \frac{1}{4n} \sum_j \min(p_j n, \tau) \\ &= \frac{1}{4} \sum_j \min(p_j, \tau_0) \end{aligned}$$

$\square$
